# Supplementary material for: Epigenetic inhibitor zebularine activates ear pinna wound closure in the mouse
Source: PubMed Central journal article supplement — eBioMedicine. 2019 Jul 11;46:317–29. doi: 10.1016/j.ebiom.2019.07.010 (PMC6710911; doi:10.1016/j.ebiom.2019.07.010), 2019-07-11
Supplement: mmc1.pdf [file mmc1.pdf]

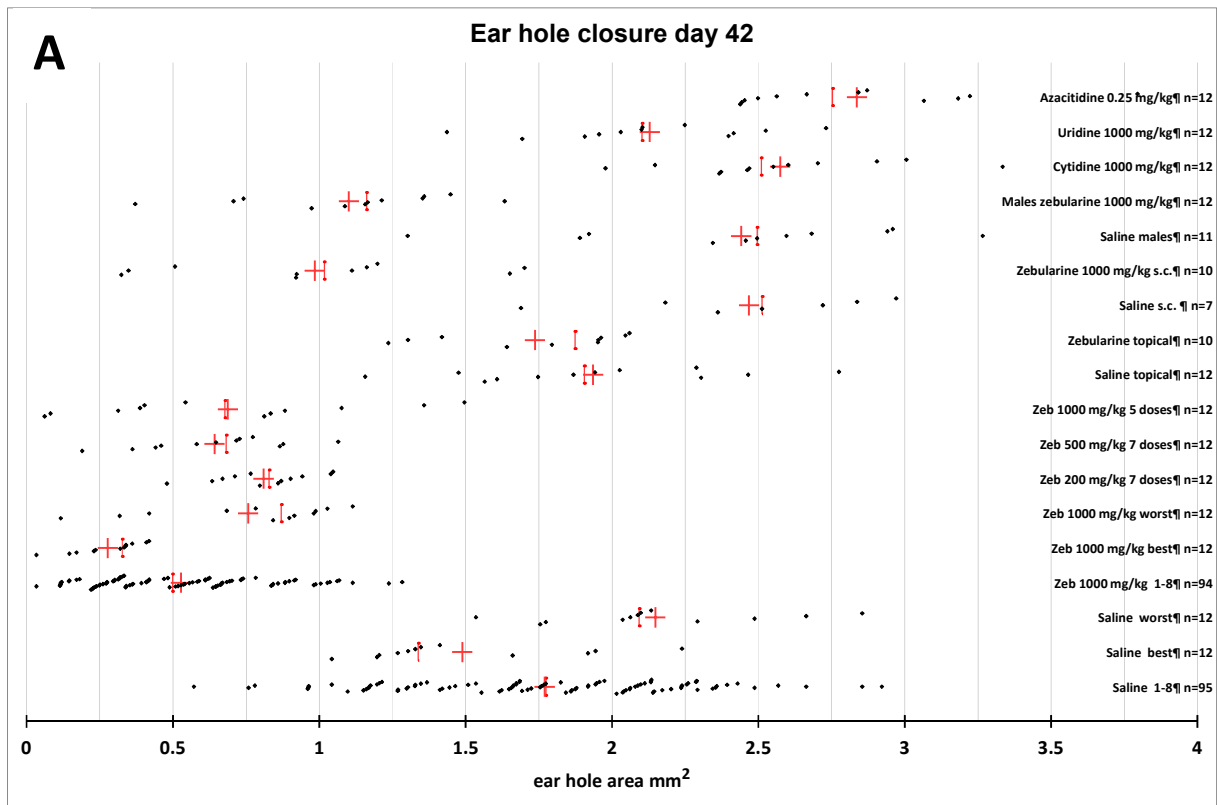

**B. Pairwise comparisons performed using the Mann-Whitney test**

| p-value                          | vs. Saline best healing group | vs. Saline worst healing group | vs. Zeb best healing group | vs. Zeb worst healing group |
|----------------------------------|-------------------------------|--------------------------------|----------------------------|-----------------------------|
| Azacitidine 0.25 mg/kg n=12      | 7.40E-07                      | 1.11E-03                       | 7.40E-07                   | 7.40E-07                    |
| Uridine 1000 mg/kg n=12          | 9.01E-04                      | 9.77E-01                       | 7.40E-07                   | 7.40E-07                    |
| Cytidine 1000 mg/kg n=12         | 6.01E-05                      | 1.66E-02                       | 7.40E-07                   | 7.40E-07                    |
| Males zebularine 1000 mg/kg n=12 | 4.04E-02                      | 4.69E-05                       | 6.01E-05                   | 1.94E-02                    |
| Saline males n=11                | 1.23E-03                      | 1.32E-01                       | 1.48E-06                   | 1.48E-06                    |
| Zebularine 1000 mg/kg s.c. n=10  | 1.11E-02                      | 1.50E-04                       | 8.69E-04                   | 1.56E-01                    |
| Saline s.c. n=7                  | 1.53E-03                      | 9.93E-02                       | 3.97E-05                   | 3.97E-05                    |
| Zebularine topical n=10          | 8.06E-02                      | 1.11E-02                       | 3.09E-06                   | 3.09E-06                    |
| Saline topical n=12              | 2.26E-02                      | 1.94E-01                       | 7.40E-07                   | 7.40E-07                    |
| Zeb 1000 mg/kg 5 doses n=12      | 1.35E-03                      | 7.40E-07                       | 2.62E-02                   | 4.70E-01                    |
| Zeb 500 mg/kg 7 doses n=12       | 4.69E-05                      | 7.40E-07                       | 4.78E-04                   | 2.14E-01                    |
| Zeb 200 mg/kg 7 doses n=12       | 4.69E-05                      | 7.40E-07                       | 7.40E-07                   | 9.77E-01                    |
| Zeb 1000 mg/kg worst n=12        | 4.69E-05                      | 7.40E-07                       | 2.01E-03                   | 1.00E+00                    |
| Zeb 1000 mg/kg best n=12         | 7.40E-07                      | 7.40E-07                       | 1.00E+00                   | 2.01E-03                    |
| Zeb 1000 mg/kg 1-8 n=94          | 3.41E-08                      | 1.92E-08                       | 7.42E-03                   | 1.42E-02                    |
| Saline worst n=12                | 1.11E-03                      | 1.00E+00                       | 7.40E-07                   | 7.40E-07                    |
| Saline best n=12                 | 1.00E+00                      | 1.11E-03                       | 7.40E-07                   | 4.69E-05                    |
| Saline 1-8 n=95                  | 4.35E-02                      | 1.49E-02                       | 1.88E-08                   | 1.63E-07                    |

**Fig. S1. Ear hole closure data.** Ear hole areas at d42 presented as dot plots (A) and complimentary pairwise comparisons with the best and worst healing groups (B).

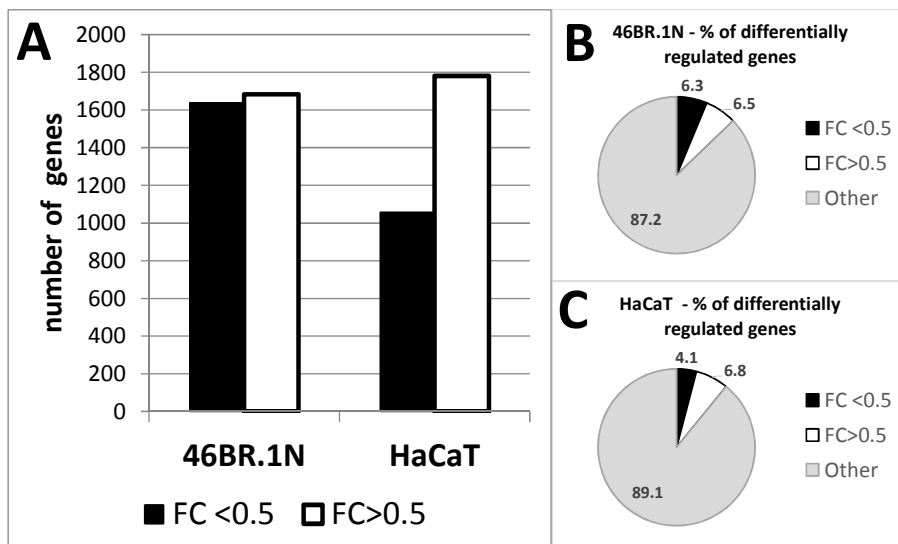

**Fig. S2. Transcriptional response to zebularine stimulation in cultured human fibroblasts (46BR.1N) and keratinocytes (HaCaT) determined using RNAseq. (A)** Numbers of genes showing a minimum two fold-change (FC); **(B)** Percentage of up- and downregulated genes in the fibroblasts (46BR.1N) and **(C)** keratinocytes (HaCaT).

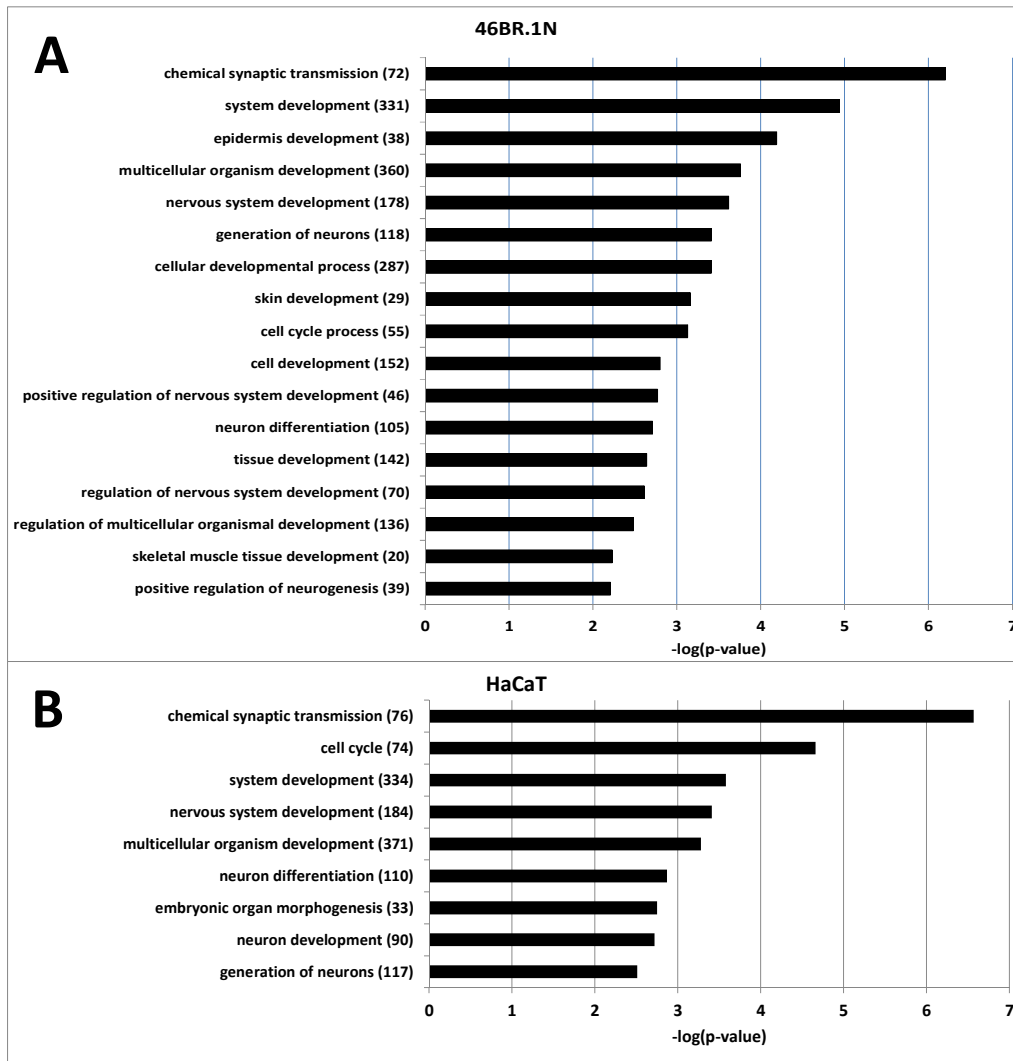

**Fig. S3. Gene ontology analyses for the genes upregulated ( $FC > 2.0$ ) under zebularine stimulation in cultured human (A) fibroblasts (46BR.1N) and (B) keratinocytes (HaCaT).** Statistical significance is presented as  $-\log_{10}$  of p-value.; the numbers of upregulated genes belonging to enriched functional categories are given in parentheses.

Gene ontology analysis conducted for the upregulated transcripts (fold change  $> 2.0$ ) exposed a significant enrichment of a number of functional categories. Of note is the enrichment of developmental genes, in particular of those involved in neuronal development in both cell lines (Fig. S2a, b). This finding corresponds to the transcriptional responses in the ear pinna in zebularine-treated mice, in which we observed a remarkable upregulation of several neurodevelopmental genes (Fig. 5). Also of note is an enrichment of cell-cycle and synaptic transmission genes.

**Table S1. PCR primer sequences.**

| Gene           | Assay           | Organism           | Primer forward             | Primer reverse             | Location             |
|----------------|-----------------|--------------------|----------------------------|----------------------------|----------------------|
| <i>Actb</i>    | gene expression | <i>M. musculus</i> | GGCTGTATTCCCCTCCATCG       | CCAGTTGGTAACAATGCCATGT     |                      |
| <i>Bdnf</i>    | gene expression | <i>M. musculus</i> | ATTAGCGAGTGGGTCACAGC       | ATTGCGAGTTCAGTGCCTT        |                      |
| <i>Dnmt1</i>   | gene expression | <i>M. musculus</i> | TCCCCTACAATGGAGAGCCA       | CACCTGTATGTTGGGCAGGT       |                      |
| <i>Dnmt3a</i>  | gene expression | <i>M. musculus</i> | TAGCGGGTGCTTACTTGTGG       | GGAACCGAAAGAGGACCAGG       |                      |
| <i>Dnmt3b</i>  | gene expression | <i>M. musculus</i> | CCACATTTGCTGGAGGATGC       | CTGCCAGGAAAAGCCCTAA        |                      |
| <i>Dnmt3l</i>  | gene expression | <i>M. musculus</i> | GTTTGCTTTCAGGCCTTCGG       | AGGTTATCCCACCGGAACT        |                      |
| <i>Myc</i>     | gene expression | <i>M. musculus</i> | CTTTCCTACCCGCTCAAC         | GCCTCTTCTCCACAGACACC       |                      |
| <i>Myt1l</i>   | gene expression | <i>M. musculus</i> | CGGAACCCAGACATGGAGGT       | CTACAGGCAAGTCCCAGCAA       |                      |
| <i>Nanog</i>   | gene expression | <i>M. musculus</i> | TACCTCAGCCTCCAGCAGAT       | CCAGATGCGTTCACCAGATA       |                      |
| <i>Neurod1</i> | gene expression | <i>M. musculus</i> | GCTACTCCAAGACCCAGAAAC      | TGTACGAAGGAGACCAGATCA      |                      |
| <i>Neurod6</i> | gene expression | <i>M. musculus</i> | TTACAGCTCAACGCCAGAAG       | TGTGGTAGGGTGGGTAGAAT       |                      |
| <i>Ngf</i>     | gene expression | <i>M. musculus</i> | GCTCACCTCAGTGTCTGGGC       | AGGGCTGTGCAAGGGAATGCT      |                      |
| <i>Nog</i>     | gene expression | <i>M. musculus</i> | CCAGCACTATCTACACATC        | TCTCGTTCAGATCCTTCTCT       |                      |
| <i>Ntf3</i>    | gene expression | <i>M. musculus</i> | CAAGCTGATCCAGCGGATA        | GCGTCTCTGTTGCCGTAGTA       |                      |
| <i>Pou5f1</i>  | gene expression | <i>M. musculus</i> | GGAGAAGTGGGTGGAGGAAG       | TGATTGGCGATGTGAGTGAT       |                      |
| <i>Sox1</i>    | gene expression | <i>M. musculus</i> | CTTCATGGTGTGGTCCCG         | TTGCTGATCTCCGAGTTGTG       |                      |
| <i>Sox2</i>    | gene expression | <i>M. musculus</i> | GGGAGAAAGAAGAGGAGAGAGA     | CGATTGTTGTATTAGTTTTTGGGA   |                      |
| <i>Tdg</i>     | gene expression | <i>M. musculus</i> | GGCATTTTATGCGGGTGCTT       | TCCAGTGGGGAGGAATACCAT      |                      |
| <i>Tbp</i>     | gene expression | <i>M. musculus</i> | GAGAGCCACGGACAACCTGCG      | GGGAACTTCACATCACAGCTC      |                      |
| <i>Tet1</i>    | gene expression | <i>M. musculus</i> | GGGCAGCTTTTGATTGTGA        | ATGCCTTATCCCACCACCG        |                      |
| <i>Tet2</i>    | gene expression | <i>M. musculus</i> | TGCGTCAGTGGAGACCTTTG       | CACTGCCTTCTCCCTACAC        |                      |
| <i>Tet3</i>    | gene expression | <i>M. musculus</i> | GGAGCCATAGGCTTCTCACC       | TGAATGACGAGCAGTCGGAG       |                      |
| <i>ACTB</i>    | gene expression | <i>H. sapiens</i>  | CATGGGTCAGAAGGATTCTT       | ACACGCAGCTCATTGTAGAA       |                      |
| <i>GABPRP</i>  | gene expression | <i>H. sapiens</i>  | CAGCCAACAGTACAAAAGTGATT    | TGGCGAGATTGTCTAAAATAACTGA  |                      |
| <i>GAPDH</i>   | gene expression | <i>H. sapiens</i>  | TGCACCACCAACTGCTTAG        | GATGCAGGGATGATGTTT         |                      |
| <i>KRT7</i>    | gene expression | <i>H. sapiens</i>  | GCGTGAGTACCAGGAACCTCATG    | GCTTGCGGTAGGTGGCG          |                      |
| <i>MEIS1</i>   | gene expression | <i>H. sapiens</i>  | GCCTATCGATTGGTGATAG        | ACTGGTCTATCATGGGCTGC       |                      |
| <i>NKX2-5</i>  | gene expression | <i>H. sapiens</i>  | TTCCC GCCGCCCCGCTTCTAT     | CGCTCCGCGTTGTCGCCCTCTGT    |                      |
| <i>POU6F2</i>  | gene expression | <i>H. sapiens</i>  | ATGTCTCAAAGTCCCGTCCG       | GCCGTTTGGAGATTGCTGAC       |                      |
| <i>PPARG</i>   | gene expression | <i>H. sapiens</i>  | GAGAAGGAGAAGCTGTGGC        | ATGCCACCTCTTTGCTCT         |                      |
| <i>TBP</i>     | gene expression | <i>H. sapiens</i>  | TGCACAGGAGCCAAGAGTGAA      | CACATCACAGCTCCCCACCA       |                      |
| <i>Bdnf</i>    | DNA methylation | <i>M. musculus</i> | GCAAGTCCTGTGTGGCCTTTTGGTCC | AAGCAGTCTGAGCAGGAGCAGTATGA | -29:-160 from TSS    |
| <i>Nanog</i>   | DNA methylation | <i>M. musculus</i> | GGCTGGGCAATGGAGGCAGTAGT    | CCAAGCCACCATTGTTACCACTGCC  | -1910:-1609 from TSS |
| <i>Nanog</i>   | DNA methylation | <i>M. musculus</i> | ACTCACTTATCTGTGAGCACAAAGG  | CTTCAGACTTACTGCAATCCCAAGT  | -982:-755 from TSS   |
| <i>Nanog</i>   | DNA methylation | <i>M. musculus</i> | CCAAAGCATGGACCAACTTA       | GACCTTGCTGCCAAAGTCTC       | -597:-406 from TSS   |

**Table S2. Power statistics**

| Figure  | Time Point | Sample 1               | Sample 2                           | Sample size 1 | Sample size 2 | $\alpha$ (alpha) | Mean 1 | Mean 2 | SD 1  | SD 2  | Beta     | Power |
|---------|------------|------------------------|------------------------------------|---------------|---------------|------------------|--------|--------|-------|-------|----------|-------|
| Fig. 1f | d42        | Saline                 | Zebularine i.p. 1000 mg/kg         | 95            | 94            | 0.05             | 0.437  | 0.832  | 0.154 | 0.094 | < 0.0001 | 1.000 |
| Fig. 2a | d42        | Saline                 | Zebularine i.p. 200 mg/kg          | 95            | 12            | 0.05             | 0.437  | 0.742  | 0.154 | 0.054 | < 0.0001 | 1.000 |
| Fig 2a  | d42        | Saline                 | Zebularine i.p. 500 mg/kg          | 95            | 12            | 0.05             | 0.437  | 0.796  | 0.154 | 0.075 | < 0.0001 | 1.000 |
| Fig. 2a | d42        | Saline                 | Zebularine i.p. 1000 mg/kg 5 doses | 95            | 12            | 0.05             | 0.437  | 0.781  | 0.154 | 0.149 | < 0.0001 | 1.000 |
| Fig. 2b | d42        | Saline s.c.            | Zebularine s.c. 1000 mg/kg         | 7             | 10            | 0.05             | 0.214  | 0.447  | 0.140 | 0.101 | 0.070    | 0.930 |
| Fig. 2c | d42        | Saline males           | Zebularine i.p. 1000 mg/kg males   | 11            | 12            | 0.05             | 0.223  | 0.650  | 0.179 | 0.113 | < 0.0001 | 1.000 |
| Fig. 2d | d42        | Saline C57BL/6J        | Zebularine i.p. C57BL/6J           | 32            | 24            | 0.05             | 0.011  | 0.611  | 0.238 | 0.193 | < 0.0001 | 1.000 |
| Fig. 2e | d42        | Saline                 | Uridine 1000 mg/kg                 | 95            | 12            | 0.05             | 0.437  | 0.322  | 0.154 | 0.117 | 0.375    | 0.625 |
| Fig. 2e | d42        | Saline                 | Cytidine 1000 mg/kg                | 95            | 12            | 0.05             | 0.437  | 0.180  | 0.154 | 0.119 | 0.001    | 0.999 |
| Fig. 2e | d42        | Saline                 | 5-azacytidine 0.25mg/kg            | 95            | 12            | 0.05             | 0.437  | 0.097  | 0.154 | 0.133 | 0.027    | 0.973 |
| Fig. 4a | d7         | CpG methylation saline | CpG methylation Zebularine         | 8             | 8             | 0.05             | 29.08  | 20.45  | 4.73  | 2.49  | < 0.0001 | 1.000 |
| Fig. 6b | d21        | Control                | Zebularine+ RA                     | 24            | 35            | 0.05             | 0.403  | 0.978  | 0.145 | 0.022 | < 0.0001 | 1.000 |
